# Supplementary material
Source: Springer Nature journal article supplement (https://www.springermedizin.de/resource/supplementary/13012_2013_602_MOESM2_ESM.pdf/9630366)
Supplement: MOESM2 [file 9630366]

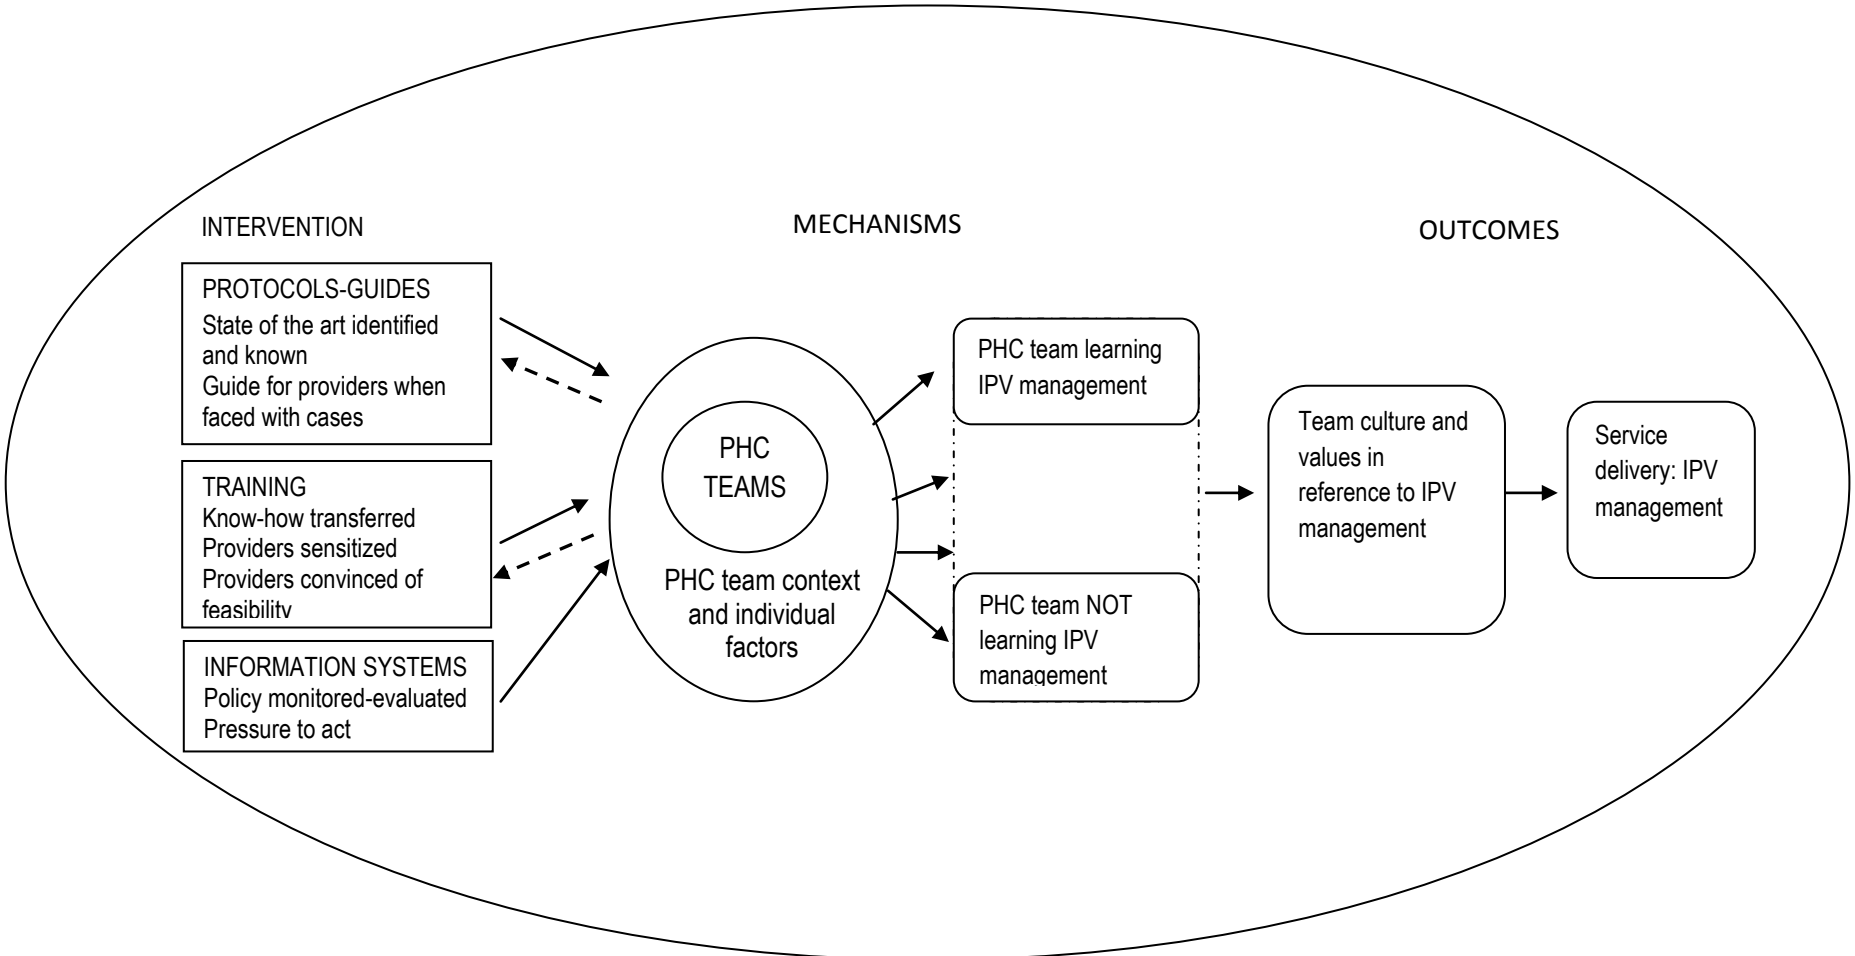

How, why and under which circumstances do PHC teams learn to integrate IPV management?

How, why and under which circumstances certain "styles" of team learning on IPV lead to certain outcomes on IPV management (in terms of organizational culture and values and service delivery)?
